# Supplementary material for: Ag/MgO Nanoparticles via Gas Aggregation Nanocluster Source for Perovskite Solar Cell Engineering
Source: MDPI journal article supplement (doi:10.3390/ma14195507), 2021-09-23
Supplement: s1 [file s1]

# Supplementary Material

## Ag/MgO Nanoparticles via Gas Aggregation Nanocluster Source for Perovskite Solar Cells Engineering

*Matteo Caleffi*<sup>\*1</sup>, *Paolo Mariani*<sup>2</sup>, *Giovanni Bertoni*<sup>3,4</sup>, *Guido Paolicelli*<sup>3</sup>, *Luca Pasquali*<sup>5,6,7</sup>, *Antonio Agresti*<sup>\*2</sup>, *Sara Pescetelli*<sup>2</sup>, *Aldo Di Carlo*<sup>2,8</sup>, *Valentina De Renzi*<sup>1,3</sup>, *Sergio D'Addato*<sup>1,3,9</sup>

- <sup>1</sup> Dipartimento di Scienze Fisiche, Matematiche e Informatiche, Università di Modena e Reggio Emilia, Via Campi 213/A, 41125, Italy
- <sup>2</sup> CHOSE, Centre for Hybrid and Organic Solar Energy, Department of Electronics Engineering, University of Rome Tor Vergata, 00133 Rome, Italy
- <sup>3</sup> CNR – Istituto Nanoscienze, Via Campi 213/A, 41125 Modena, Italy
- <sup>4</sup> IMEM – CNR, Parco Area delle Scienze 37/A, 43124 Parma, Italy
- <sup>5</sup> Dipartimento di Ingegneria E. Ferrari, Università di Modena e Reggio Emilia, Via Vivarelli 10, 41125, Modena, Italy
- <sup>6</sup> IOM – CNR, s.s. 14, Km. 163.5 in AREA Science Park, Basovizza, Trieste 34149, Italy
- <sup>7</sup> Department of Physics, University of Johannesburg, PO Box 524, Auckland Park 2006, South Africa
- <sup>8</sup> ISM-CNR, Istituto di Struttura della Materia, Consiglio Nazionale delle Ricerche, 00133 Rome, Italy
- <sup>9</sup> EN&TECH, Università di Modena e Reggio Emilia, Italy

\* Correspondence: [matteo.caleffi@unimore.it](mailto:matteo.caleffi@unimore.it); [antonio.agresti@uniroma2.it](mailto:antonio.agresti@uniroma2.it).

## XPS of MgO on TiO<sub>2</sub>

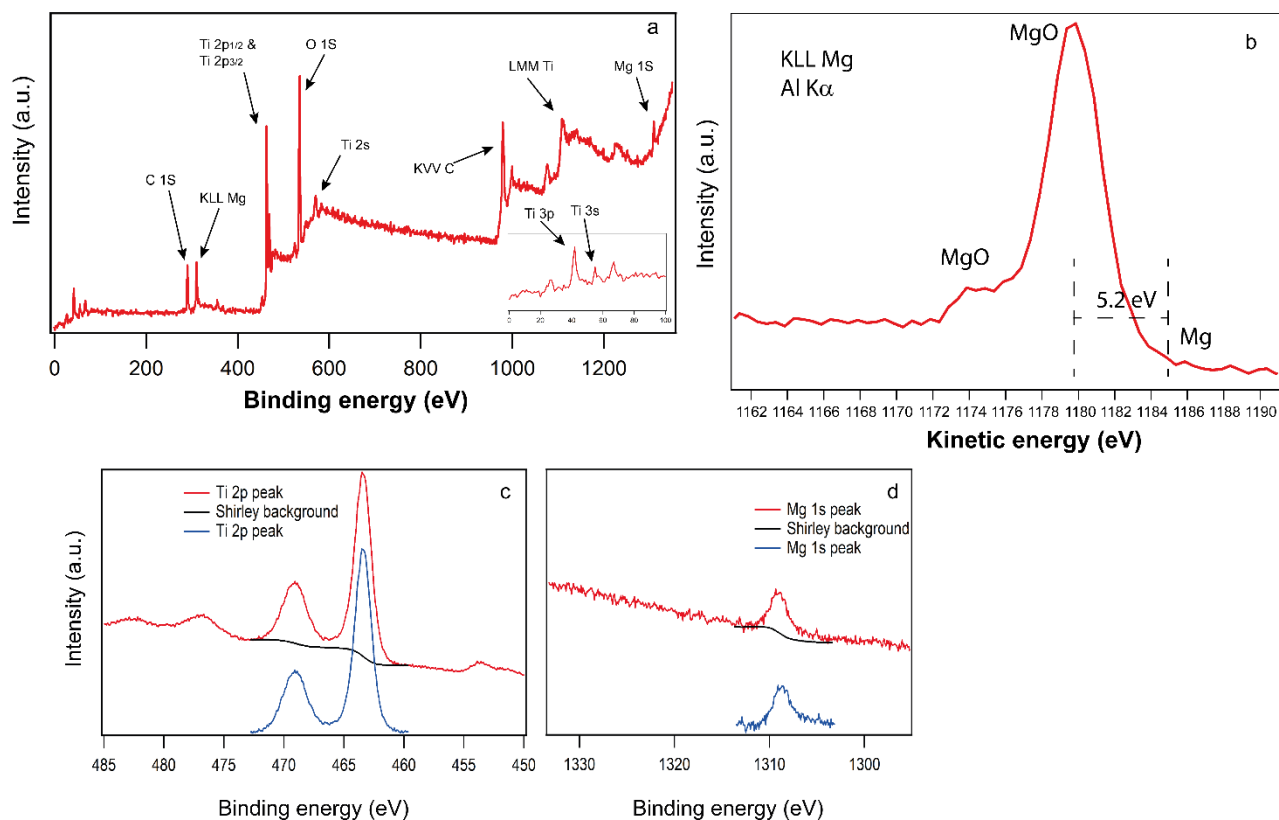

**Figure S1:** XPS (a) wide spectrum of the TiO<sub>2</sub> sample with MgO deposited on the surface, (b) Mg KLL, (c) Ti 2p core levels and (d) Mg 1s core levels with background subtractions.

## AFM

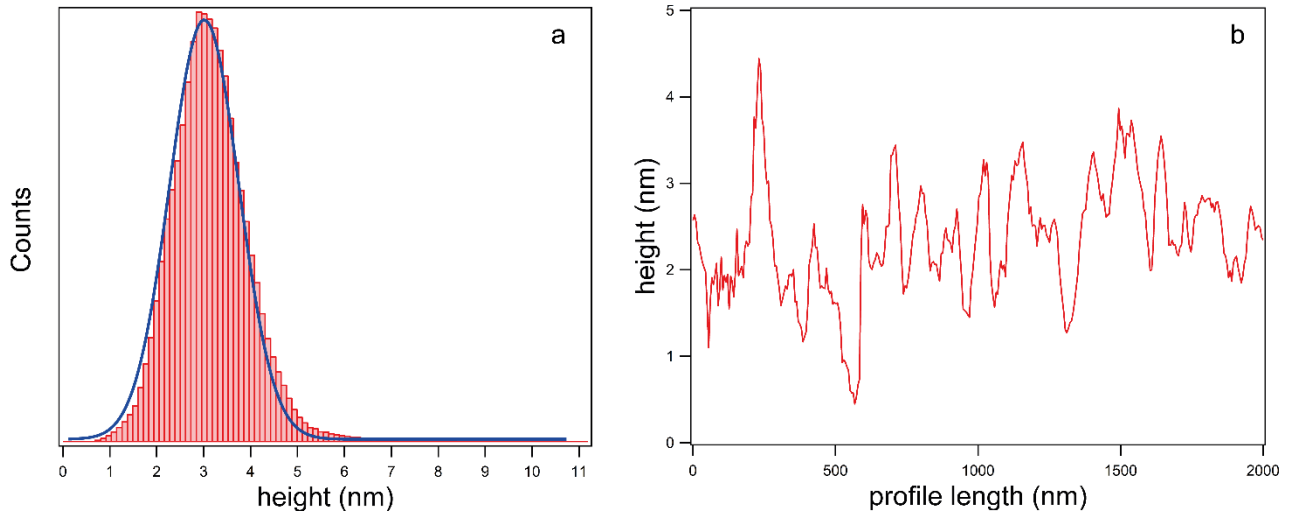

**Figure S2:** AFM (a) Height distribution of the substrate roughness (flat TiO<sub>2</sub>) and (b) height of a profile line of 2 μm length.

## Calculation of polarizability

The in-plane polarizability of a system made of isolated Ag oblate spheroids ( $a = b > c$ ) embedded in a magnesia (MgO) matrix is calculated using Maxwell Garnett theory:

$$\alpha_{//}(\omega) \propto \frac{\epsilon_{Ag}(\omega) - \epsilon_{MgO}}{\epsilon_{MgO} + L_{//}(\epsilon_{Ag}(\omega) - \epsilon_{MgO})}$$

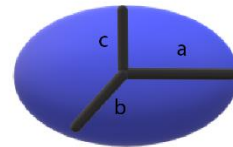

where  $\epsilon_{Ag}(\omega)$  is the dielectric function of Silver,  $\epsilon_{MgO}$  is the dielectric function of Magnesium Oxide,  $L_{//}$  is the depolarisation factor of the in-plane direction. Different values of  $\epsilon_{MgO}$  have been used according to what found in literature for thin layers of MgO.
